# Supplementary material for: A CRISPR-Cas9 Assisted Non-Homologous End-Joining Strategy for One-step Engineering of Bacterial Genome
Source: PubMed Central journal article supplement (PMC5121644; doi:10.1038/srep37895), 2016-11-24
Supplement: srep37895-s1.pdf [file srep37895-s1.pdf]

---

**SUPPLEMENTARY INFORMATION**

**A CRISPR-Cas9 Assisted Non-Homologous End-Joining Strategy for One-step Engineering of Bacterial Genome**

Tianyuan Su<sup>1</sup>, Fapeng Liu<sup>1</sup>, Pengfei Gu<sup>1</sup>, Haiying Jin<sup>1</sup>, Yizhao Chang<sup>1</sup>, Qian Wang<sup>2</sup>, Quanfeng Liang<sup>1</sup>, Qingsheng Qi<sup>1,2</sup>

<sup>1</sup>State Key Laboratory of Microbial Technology, Shandong University, Jinan 250100, People's Republic of China

<sup>2</sup>National Glycoengineering Center, Shandong University, Jinan, 250100, People's Republic of China

\* Corresponding author: Qingsheng Qi

E.mail: [qiqingsheng@sdu.edu.cn](mailto:qiqingsheng@sdu.edu.cn)

Tel: +86-531-88365628;

Fax: +86-531-88362897

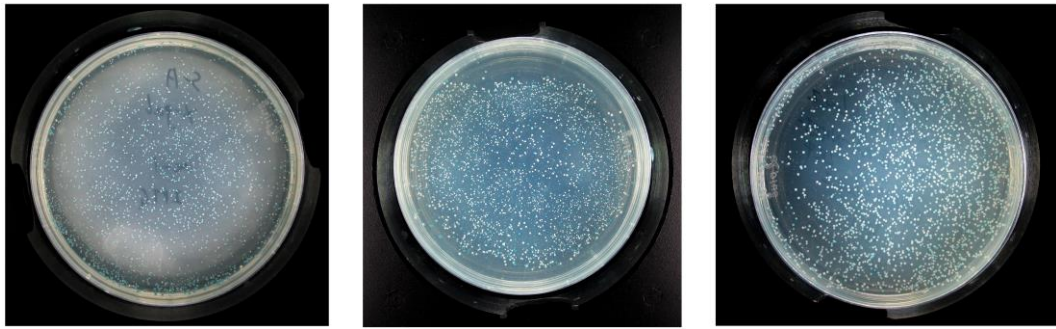

*HindIII*-linearized pUC19

*SmaI*-linearized pUC19

CRISPR-cleaved pUC-lacZ

**Supplementary Figure 1. Blue-white screening of the transformants to determine the efficiency and fidelity of the heterogenous NHEJ pathway in *E. coli*.** White colonies represent the *lacZ* genotype and blue colonies represent the *lacZ*<sup>+</sup> genotype.

### *HindIII*-linearized pUC19

|                                         |                                                                                                                                                                                                                                                                                                                                                                                                                                                                                                                                                                                                                                                                                                                                                                                                 |
|-----------------------------------------|-------------------------------------------------------------------------------------------------------------------------------------------------------------------------------------------------------------------------------------------------------------------------------------------------------------------------------------------------------------------------------------------------------------------------------------------------------------------------------------------------------------------------------------------------------------------------------------------------------------------------------------------------------------------------------------------------------------------------------------------------------------------------------------------------|
| <b>WT</b>                               | TTACGCCAAGCTTGCATGCCTGCAGGTCGACTCTAGAGGATCCCGGGGTACCGAGCTCGAATTCAGTGGCCGTCGTTTTACAACGTCGTG                                                                                                                                                                                                                                                                                                                                                                                                                                                                                                                                                                                                                                                                                                      |
| <b>8 random selected white colonies</b> | TTACGCCAAGCTTGCATGCCTGCAGGTCGACTCTAGA <b>GG</b> -----GTACCGAGCTCGAATTCAGTGGCCGTCGTTTTACAACGTCGTG<br>TTACGCCAAGCTTGCATGCCTGCAGGTCGACTCTAGAGGATCC <b>CGT</b> -----AGCTCGAATTCAGTGGCCGTCGTTTTACAACGTCGTG<br>TTACGCCAAGCTTGCATGCCTGCAGGTCGACTCTAGAGGATCC <b>CGT</b> -----AGCTCGAATTCAGTGGCCGTCGTTTTACAACGTCGTG<br>TTACGCCAAGCTTGCATGCCTGCAGGTCGACTCTAGA <b>GG</b> -----GTACCGAGCTCGAATTCAGTGGCCGTCGTTTTACAACGTCGTG<br>TTACGCCAAGCTTGCATGCCTGCAG <b>CGT</b> -----GAGCTCGAATTCAGTGGCCGTCGTTTTACAACGTCGTG<br>TTACGCCAAGCTTGCATGCCTGCAG <b>CGT</b> -----ACCGAGCTCGAATTCAGTGGCCGTCGTTTTACAACGTCGTG<br>TTACGCCAAGCTTGCATGCCTGCAG <b>GGT</b> -----ACCGAGCTCGAATTCAGTGGCCGTCGTTTTACAACGTCGTG<br>TTACGCCAAGCTTGCATGCCTGCAGG <b>TC</b> -----ACCGAGCTCGAATTCAGTGGCCGTCGTTTTACAACGTCGTG<br><b>N<sub>8</sub></b> |

### *SmaI*-linearized pUC19

|                                         |                                                                                                                                                                                                                                                                                                                                                                                                                                                                                                                                                                                                                                                                |
|-----------------------------------------|----------------------------------------------------------------------------------------------------------------------------------------------------------------------------------------------------------------------------------------------------------------------------------------------------------------------------------------------------------------------------------------------------------------------------------------------------------------------------------------------------------------------------------------------------------------------------------------------------------------------------------------------------------------|
| <b>WT</b>                               | TTGTGTGGAATTGTGAGCGGATAACAATTTACACAGGAAACAGCTATGACCATGATTACGCC <b>AAGCTT</b> GCATGCCTGCAGGTCGACTCTA                                                                                                                                                                                                                                                                                                                                                                                                                                                                                                                                                            |
| <b>8 random selected white colonies</b> | TTGTGTGGAATTGTGAGCGGATAACAATTTACACAGGAAACAGCTATGACCATGATTACGCC <b>AAGCTT</b> GCATGCCTGCAGGTCGACTCTA<br>TTGTGTGGAATTGTGAGCGGATAACAATTTACACAGGAAACAGCTATGACCATGATTACGCC <b>AAGCTT</b> GCATGCCTGCAGGTCGACTCTA<br>TTGTGTGGAATTGTGAGCGGATAACAATTTACACAGGAAACAGCTATGACCATGATTACGCC <b>AAGCTT</b> GCATGCCTGCAGGTCGACTCTA<br>TTGTGTGGAATTGTGAGCGGATAACAATTTACACAGGAAACAGCTATGACCATGATTACGCC <b>AAGCTT</b> GCATGCCTGCAGGTCGACTCTA<br>TTGTGTGGAATTGTGAGCGGATAACAATTTACACAGGAAACAGCTATGACCATGATTACGCC <b>AAGCTT</b> GCATGCCTGCAGGTCGACTCTA<br>TTGTGTGGAATTGTGAGCGGATAACAATTTACACAGGAAACAGCTATGACCATGATTACGCC <b>AAGCTT</b> GCATGCCTGCAGGTCGACTCTA<br><b>N<sub>8</sub></b> |

### CRISPR-cleaved pUC-lacZ

|                                         |                                                                                                                                                                                                                                                                                                                                                                                                                                                                                                                                                                                                                                                                                                                                                                                                                                                                                              |
|-----------------------------------------|----------------------------------------------------------------------------------------------------------------------------------------------------------------------------------------------------------------------------------------------------------------------------------------------------------------------------------------------------------------------------------------------------------------------------------------------------------------------------------------------------------------------------------------------------------------------------------------------------------------------------------------------------------------------------------------------------------------------------------------------------------------------------------------------------------------------------------------------------------------------------------------------|
| <b>WT</b>                               | GGGTACCGAGCTCGAATTCAGTGG <b>CCGTCGTTTTACAACGCTGCTGACTGGGAAAACC</b> CTGGCGTTACCCAACCTTAATCGCCTTGCAGCAC                                                                                                                                                                                                                                                                                                                                                                                                                                                                                                                                                                                                                                                                                                                                                                                        |
| <b>8 random selected white colonies</b> | GGGTACCGAGCTCGAATTCAGTGG <b>CCGTCGTTTTACAACGCTGCTGACTGGGAAAACC</b> CTGGCGTTACCCAACCTTAATCGCCTTGCAGCAC<br>GGGTACCGAGCTCGAATTCAGTGG <b>CCGTCGTTTTACAACGCTGCTGACTGGGAAAACC</b> CTGGCGTTACCCAACCTTAATCGCCTTGCAGCAC<br><b>N<sub>8</sub></b> |

**Supplementary Figure 2. Sanger sequencing analysis of 8 random selected white colonies (*lacZ*<sup>-</sup> genotype) generated by repair of *HindIII*/*SmaI*-linearized pUC19 or Cas9-cleaved pUC-lacZ, respectively. The recognition sequences of *HindIII*/*SmaI* and the LR4-CRISPR target are shown in orange. The PAM sequences are shown in red. The light blue color indicates micro-homology sequence for ending-joining and the dashed line highlighted in yellow represents the deleted nucleotides by NHEJ.**

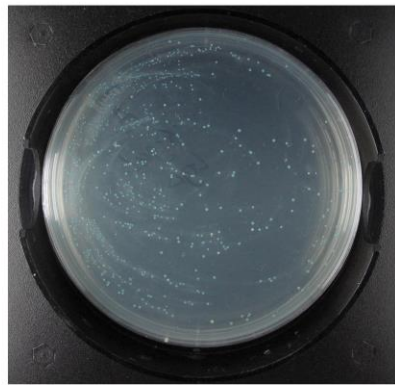

**MG1655**  
**crRNA**

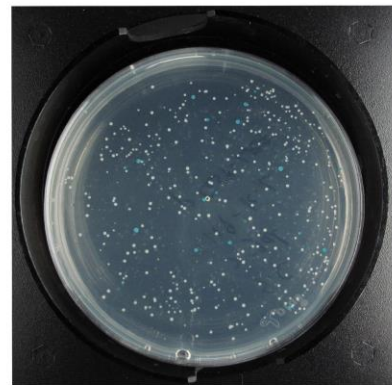

**MG1655**  
**sgRNA**

**Supplementary Figure 3. Blue-white screening of the transformants to evaluate the efficiency and positivity rate of the improved CA-NHEJ system using L4 target site in *E. coli* MG1655.** White colonies represent the *lacZ* genotype and blue colonies represent the *lacZ*<sup>+</sup> genotype.

|                                        |                                                                                                           |      |
|----------------------------------------|-----------------------------------------------------------------------------------------------------------|------|
| <b>WT</b>                              | CGAGGTTTATAGACTATGCTGTTTTGAATGGTCCCAAACGGTTTTCCAGTCACGACGTTGTA AAAACGAGTTTTAGAGCTATGCTGTTTTGAATGGTCCCAAAC | TTCA |
| <b>8 random selected blue colonies</b> | CGAGGTTTATAGACTATGCTGTTTTGAATGGTCCCAAACGGTTTTCCAGTCACGACGTTGTA AAAACGAGTTTTAGAGCTATGCTGTTTTGAATGGTCCCAAAC | TTCA |
|                                        | CGAGGTTTATAGACTATGCTGTTTTGAATGGTCCCAAACGGTTTTCCAGTCACGACGTTGTA AAAACGAGTTTTAGAGCTATGCTGTTTTGAATGGTCCCAAAC | TTCA |
|                                        | CGAGGTTTATAGACTATGCTGTTTTGAATGGTCCCAAACGGTTTTCCAGTCACGACGTTGTA AAAACGAGTTTTAGAGCTATGCTGTTTTGAATGGTCCCAAAC | TTCA |
|                                        | CGAGGTTTATAGACTATGCTGTTTTGAATGGTCCCAAACGGTTTTCCAGTCACGACGTTGTA AAAACGAGTTTTAGAGCTATGCTGTTTTGAATGGTCCCAAAC | TTCA |
|                                        | CGAGGTTTATAGACTATGCTGTTTTGAATGGTCCCAAACGGTTTTCCAGTCACGACGTTGTA AAAACGAGTTTTAGAGCTATGCTGTTTTGAATGGTCCCAAAC | TTCA |
|                                        | CGAGGTTTATAGACTATGCTGTTTTGAATGGTCCCAAACGGTTTTCCAGTCACGACGTTGTA AAAACGAGTTTTAGAGCTATGCTGTTTTGAATGGTCCCAAAC | TTCA |
|                                        | CGAGGTTTATAGACTATGCTGTTTTGAATGGTCCCAAACGGTTTTCCAGTCACGACGTTGTA AAAACGAGTTTTAGAGCTATGCTGTTTTGAATGGTCCCAAAC | TTCA |

**Supplementary Figure 4. Sanger sequencing analysis of the LR4 CRISPR array in 8 random selected blue colonies grown on the X-gal plate.** The repeat sequences and the LR4 spacer of CRISPR array are shown in blue and orange, respectively. The dashed line highlighted in yellow indicates the deleted sequences.

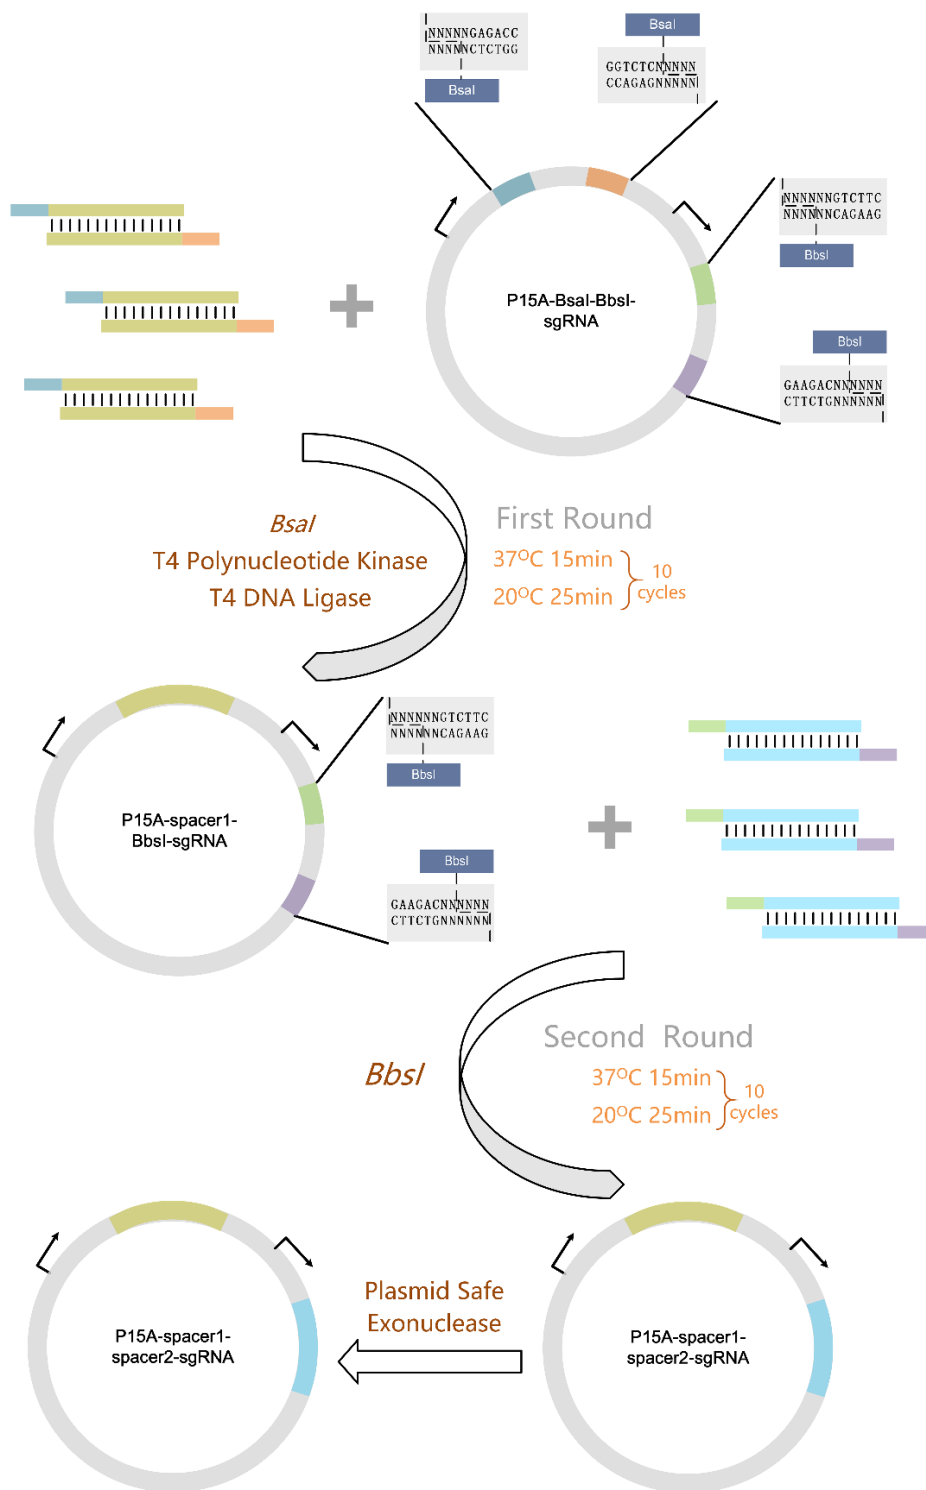

**Supplementary Figure 5. One-step digestion-ligation method based on golden gate cloning to easy clone of specific sgRNA pair cassettes in plasmid p15A-BsaI-BbsI-sgRNA.** The one-step digestion-ligation cloning strategy for ligation of the sgRNA pairs into the p15A-BsaI-BbsI-sgRNA plasmid was accomplished through two rounds iterative golden gate cloning in a 30- $\mu$ l reaction system. Tan: spacer 1; Light blue: spacer 2.

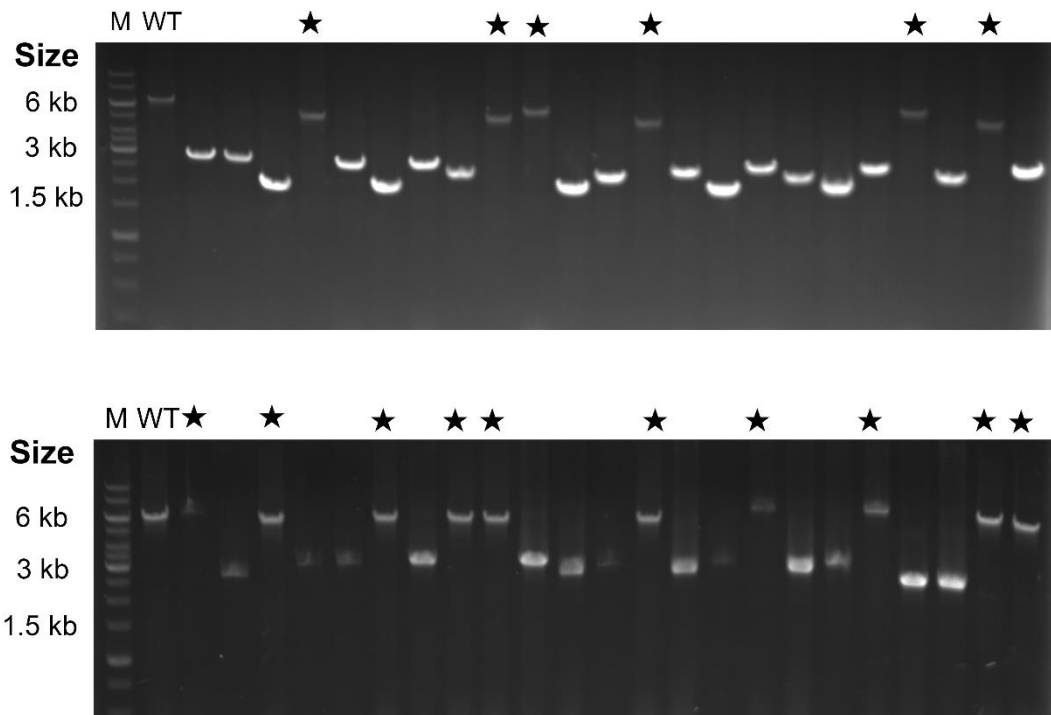

**Supplementary Figure 6. Gel electrophoresis of the PCR products to distinguish the mutation types of *lacZ* by sgRNA pair L4&LR8. Asterisk indicates the frameshift mutation of *lacZ*.**

**Supplementary Table 1. Primers used in this study (The homologous sequences used for assembling were in bold, restriction sites were underlined).**

| <b>Primers</b>                           | <b>Nucleotide sequence(5'-3')</b>                                                                            |
|------------------------------------------|--------------------------------------------------------------------------------------------------------------|
| <b>Primers for plasmids construction</b> |                                                                                                              |
| lacZ-F                                   | CCCAA <u>AAGCTT</u> ACAGCTATGACCATGATTACGGATT                                                                |
| lacZ-R                                   | TCCAGAT <u>CTAGACCTT</u> ACGCGAAATACGGGCAGACAT                                                               |
| Cm-Ori-F                                 | <b>TAGTGTGAGATCTCATCGGGCTTACTCGATGCATGCGCTAACCGTTTTTATCAGGCTCTGGG</b>                                        |
| Cm-Ori-R                                 | <b>ATCCGTACGCCTGCAGGTCTAGATTAATTAACGCCGGCGGCGGCGCTATGGACAGTTTTCCCTTTGATAT</b>                                |
| cas9-F                                   | <b>GCGGCCGCCGCCGGCGTTAATTAATCTAGACCTGCAGGCGTACGGATTACGAAATCATCCTGTGGAGC</b>                                  |
| cas9-R                                   | <b>CGGTTAGCGCATGCATCGAGTAAGCCCGATGAGATCTCACACTACTCTTCTTTTGCCTATTATAAC</b>                                    |
| 23119-ligd-F                             | ACCGTA <u>AAGATCT</u> TTTGACAGCTAGCTCAGTCCTAGGTATAATGCTAGCTACTAGAGAAAGAGGAGAAATACTAGATGGGTT<br>CGGCGTCGGAGCA |
| 23119-ligd-R                             | <b>TTAATTCATTCGCGCACCCACCTCACTGG</b>                                                                         |
| mku-F                                    | <b>GCGGCCGGACAAGAAACCCAGTGAGGTGGTGCGCGAATGAATTAAGAGGAGAATACTAGATGCGAGCCATTTGGA</b><br>CGGG                   |
| mku-R                                    | ACAATG <u>ATGCAT</u> TTTAGCGCAAGAAGACAAAAATCACCTTGCGCTAATGCTCTGTTACAGTCACGGAGGCGTTGGGACG                     |
| CRISPR-F                                 | TCCAGAT <u>CTAGATGCCT</u> CTAGCACGCGTACCAT                                                                   |
| CRISPR-R                                 | TCCAGAT <u>CTAGATGACCGA</u> ATTCAACTCAACAAGT                                                                 |
| NHEJ-F                                   | ACCGATA <u>ACTAGT</u> TTTGACAGCTCAGTCCTAGGTATAATGCTAGC                                                       |
| NHEJ-R                                   | ACCGATA <u>ACTAGT</u> TTTAGCGCAAGAAGACAAAAATCACCTTGCGC                                                       |

---

|         |                                                                  |
|---------|------------------------------------------------------------------|
| Spc-F   | TCTGTTGTTTGTCTGGTGAAGTGGATCCCTTAGTAAAGCCCTCGCTAGATT              |
| Spc-R   | ACCATCATACTAAATCAGTAAGTTGGCAGCATCACCCGACGGCTCGTTCGCCAGCCAGGACAGA |
| P15A-F  | CGTCGGGTGATGCTGCCAACTTA                                          |
| P15A-R  | ACTTATATCGTATGGGGCTGACTTC                                        |
| sgRNA-F | AGCACCTGAAGTCAGCCCCATACGATATAAGTCTATAAAAATAGGCGTATCACGAGGC       |
| sgRNA-R | TTACTAAGGGATCCAGTTCACCGACAAACAACAGA                              |

**Primers for gene knockout**

|       |                         |
|-------|-------------------------|
| lac-F | CGATACCGAAGACAGCTCATGT  |
| lac-R | TATCATCGCCGGGCTTGCCCCGT |

**Primers for fragment deletion analysis**

|         |                            |
|---------|----------------------------|
| LacZ-JF | ATGTCCGCCGTAGCCCCTCCGATGAT |
| LacZ-JR | CCAGCAGGAACGGTACTTCAAAC    |
| Lac-JF  | AGCGCCTCGTCATCAATACCAAT    |
| Lac-JR  | TTCCCACAAGACAACAACCACTCC   |
| LC-JF   | CAGAACAATGAGCAGACGGAATA    |
| LC-JR   | GGAGGCTAACAGTGTCGAATAAC    |
| MLC-JF  | AGCCCTTCCATCAGAGCGACCA     |
| MLC-JR  | CACACAACCGGCACAAACCACC     |

---



**Supplementary Table 2. Plasmids used in this study.**

| Plasmids            | Relevant genotype                                                                                               | Reference  |
|---------------------|-----------------------------------------------------------------------------------------------------------------|------------|
| pUC19               | Cloning vector, Amp <sup>R</sup>                                                                                | Lab stock  |
| pCRISPR             | pUC19 containing CRISPR array, kan <sup>R</sup>                                                                 | 1          |
| pCas9               | pACYC184 containing tracr RNA, <i>cas9</i> and CRISPR array, Cm <sup>R</sup>                                    | 1          |
| pwtCas9             | pUC19 containing aTc-inducible promoter P <sub>LtetO-1</sub> expressing <i>cas9</i> , Amp <sup>R</sup>          | 2          |
| pTKRED              | Temperature-conditional replicon containing $\gamma$ , $\beta$ , <i>exo</i> (red recombinase), Spc <sup>R</sup> | 3          |
| pCP20               | Helper plasmid, Cm <sup>R</sup>                                                                                 | 4          |
| pUC-lacZ            | pUC19 containing <i>lacZ</i> gene, Amp <sup>R</sup>                                                             | This study |
| pCas9 (Ts)          | Temperature-conditional replicon containing <i>cas9</i> , Cm <sup>R</sup>                                       | This study |
| pCas9 (Ts)-NHEJ     | pCas9 (Ts) containing p23119- <i>mku-ligd</i> , Cm <sup>R</sup>                                                 | This study |
| pCas9 (Ts)-LR4      | pCas9 (Ts) containing LR4-CRISPR array, Cm <sup>R</sup>                                                         | This study |
| pCas9 (Ts)-NHEJ-LR4 | pCas9 (Ts)-NHEJ containing LR4-CRISPR array, Cm <sup>R</sup>                                                    | This study |
| pcurCas9 (Ts)-NHEJ  | pCas9 (Ts)-NHEJ containing <i>lacI</i> and trc-p15A-sgRNA, Cm <sup>R</sup>                                      | This study |
| pwtCas9-NHEJ        | pwtCas9 containing p23119- <i>mku-ligd</i> , Amp <sup>R</sup>                                                   | This study |
| p15A-gRNA           | p15A replicon containing sgRNA, spc <sup>R</sup>                                                                | This study |
| p15A-BsaI-BbsI-gRNA | p15A replicon containing two sgRNA modules for one-step constructing sgRNA pairs, spc <sup>R</sup>              | This study |
| pCRISPR-L4          | pCRISPR containing L4 CRISPR array, kan <sup>R</sup>                                                            | This study |
| pCRISPR-LR4         | pCRISPR containing LR4 CRISPR array, kan <sup>R</sup>                                                           | This study |
| p15A-L4             | p15A-gRNA containing sgRNA L4, spc <sup>R</sup>                                                                 | This study |
| p15A-L5             | p15A-gRNA containing sgRNA L5, spc <sup>R</sup>                                                                 | This study |
| p15A-LR4            | p15A-gRNA containing sgRNA LR4, spc <sup>R</sup>                                                                | This study |
| p15A-LR6            | p15A-gRNA containing sgRNA LR6, spc <sup>R</sup>                                                                | This study |

---

|               |                                                                      |            |
|---------------|----------------------------------------------------------------------|------------|
| p15A-LR7      | p15A-gRNA containing sgRNA LR7, spc <sup>R</sup>                     | This study |
| p15A-LR8      | p15A-gRNA containing sgRNA LR8, spc <sup>R</sup>                     | This study |
| p15A-L4&LR8   | p15A-BsaI-BbsI-gRNA containing sgRNA pair L4&LR8, spc <sup>R</sup>   | This study |
| p15A-LI10&LA0 | p15A-BsaI-BbsI-gRNA containing sgRNA pair LI10&LA0, spc <sup>R</sup> | This study |
| p15A-LI10&CR0 | p15A-BsaI-BbsI-gRNA containing sgRNA pair LI10&CR0, spc <sup>R</sup> | This study |
| p15A-ME17&CR0 | p15A-BsaI-BbsI-gRNA containing sgRNA pair ME17&CR0, spc <sup>R</sup> | This study |

---

---

**Supplementary Table 3. CRISPR target sequences used in this study.**

---

| <b>Spacer name</b> | <b>Nucleotide sequence (5'-3')</b> |
|--------------------|------------------------------------|
| L4-CRISPR          | GGTTTTCCCAGTCACGACGTTGTAAAACGA     |
| LR4-CRISPR         | TCCGCCGTTTGTCCACGGAGAATCCGAC       |
| L4                 | GTCACGACGTTGTAAAACGA               |
| L5                 | GTGAGCGAGTAACAACCCGT               |
| LR4                | GTTCCCACGGAGAATCCGAC               |
| LR6                | CAACGTGACCTATCCCATTA               |
| LR7                | CCATCGCCATCTGCTGCACG               |
| LR8                | CTCCTGGAGCCCGTCAGTAT               |
| LI10               | TACGATGTTCGCAGAGTATGC              |
| LA0                | ATTGGCAATAACGTCTGGAT               |
| CR0                | CCCGCCACTACTGGAGAGAA               |
| ME17               | GTTTCGCGATCGACTCGTAC               |

---

---

## Supplementary Note 1

### The sequences of core elements in this study

#### *P<sub>123119</sub>-ligd-mku*

ttgacagctagctcagtcctaggtataatgctagctactagagAAAGAGGAGAAATACTAGATG  
GGTTCGGCGTCGGAGCAACGGGTGACGCTGACCAACGCCGACAAGG  
TGCTCTATCCCGCCACCGGGACCACAAAGTCCGATATCTTCGACTACT  
ACGCCGGTGTTGCCGAAGTCATGCTCGGCCACATCGCGGGACGGCCG  
GCGACGCGCAAGCGCTGGCCTAACGGCGTCGACCAACCCGCGTTCTT  
CGAAAAGCAGTTGGCGTTGTCGGCGCCGCCTTGGCTGTCACGTGCAA  
CGGTGGCGCACCGGTCCGGGACGACGACCTATCCGATCATCGATAGC  
GCAACCGGGCTGGCCTGGATCGCCCAACAGGCGGCGCTGGAGGTGC  
ACGTGCCGCAGTGGCGGTTTGTTCGCCGAGCCCGGATCAGGTGAGTTA  
AATCCGGGCCC GGCAACGCGTTTGGTGTTTCGACCTGGACCCGGGCGA  
AGGCGTGATGATGGCCCAGCTGGCCGAGGTGGCGCGCGCGGTTTCGTG  
ATCTTCTCGCCGATATCGGGTTGGTCACCTTCCCGGTCACCAGCGGCA  
GCAAGGGATTGCATCTGTACACACCGCTGGATGAGCCGGTGAGCAGC  
AGGGGAGCCACGGTGTTGGCCAAGCGCGTCGCGCAGCGATTGGAGC  
AGGCGATGCCCGCGTTGGTCACCTCGACCATGACCAAAAAGCCTGCGG  
GCCGGGAAGGTGTTTGTGGACTGGAGCCAGAACAGCGGCTCGAAGA  
CCACCATCGCGCCGTACTCACTACGTGGCCGGACGCATCCGACCGTC  
GCGGCGCCACGCACCTGGGCGGAGCTCGACGACCCCGCACTGCGTC  
AGCTCTCCTACGACGAGGTGCTGACCCGGATTGCCCGCGACGGCGAT  
CTGCTCGAGCGGCTGGATGCCGACGCTCCGGTAGCGGACCGGTTGAC  
CCGATAACGCCGCATGCGCGACGCATCGAAAACCTCCCGAGCCGATTCC  
CACGGCGAAACCCGTTACCGGAGACGGCAATACGTTTCGTCATCCAGG  
AGCATCACGCGCGTCGGCCGCACTACGATTTCCGGCTGGAATGCGAC  
GGCGTGCTGGTTTCGTGGGCGGTACCGAAAAACCTGCCCGACAACAC  
ATCGGTTAACCATCTAGCGATAACACACCGAGGACCACCCGCTGGAATA  
CGCCACGTTTCGAGGGCGCGATTCCCAGCGGGGAGTACGGCGCCGGCA  
AGGTGATCATCTGGGACTCCGGCACTTACGACACCGAGAAGTTCCAC  
GATGACCCGCACACGGGGGAGGTTCATCGTGAATCTGCACGGCGGCCG

---

GATCTCTGGGCGTTATGCGCTGATTTCGGACCAACGGCGATCGGTGGCT  
GGCGCACCGCCTAAAGAATCAGAAAGACCAGAAGGTGTTTCGAGTTCG  
ACAATCTGGCCCCAATGCTTGCCACGCACGGCACGGTGGCCGGTCTA  
AAGGCCAGCCAGTGGGCGTTTCGAAGGCAAGTGGGACGGCTACCGGTT  
GCTGGTTGAGGCTGACCACGGCGCCGTGCGGCTGCGGTCCCGCAGC  
GGGCGCGATGTCACCGCCGAGTATCCGCAATTGCGGGCATTGGCGGA  
GGATCTCGCCGATCACCACGTGGTGCTGGACGGCGAGGCCGTTCGTAC  
TTGACTCCTCTGGTGTGCCAGCTTCAGCCAGATGCAGAATCGGGGC  
CGCGACACCCGTGTCGAGTTCTGGGCGTTCGACCTGCTCTACCTCGA  
CGGCCGCGCGCTGCTAGGCACCCGCTACCAAGACCGGCGTAAGCTGC  
TCGAAACCCTAGCTAACGCAACCAGTCTCACCGTTCCTCGAGCTGCTGC  
CCGGTGACGGCGCCCAAGCGTTTGCGTGCTCGCGCAAGCACGGCTGG  
GAGGGCGTGATCGCCAAGAGGCGTGACTCGCGCTATCAGCCGGGCCG  
GCGCTGCGCGTCGTGGGTCAAGGACAAGCACTGGAACACCCAGGAA  
GTCGTCATTGGTGGCTGGCGCGCCGGGGAAAGGCGGGCGCAGCAGTG  
GCGTCCGGTTCGCTGCTCATGGGCATCCCCGGTCCAGGTGGGCTGCAG  
TTCGCCGGGCGGGTTCGGTACCGGCCTCAGCGAACGCGAACTGGCCAA  
CCTCAAGGAGATGCTGGCGCCGCTGCATACCGACGAGTCCCCCTTCG  
ACGTACCACTGCCCGCGCGTGACGCCAAGGGCATCACATATGTCAAGC  
CGGCGCTGGTTGCAGAGGTGCGCTACAGCGAGTGGACTCCGGAGGG  
CCGGCTGCGTCAATCAAGCTGGCGTGGGCTGCGGCCGGACAAGAAAC  
CCAGTGAGGTGGTGCGCGAATGAtactagagATTAAAGAGGAGAATACTA  
GATGCGAGCCATTTGGACGGGTTTCGATCGCCTTCGGGCTGGTGAACG  
TGCCGGTCAAGGTGTACAGCGCTACCGCAGACCACGACATCAGGTTC  
CACCAGGTGCACGCCAAGGACAACGGACGCATCCGGTACAAGCGCGT  
CTGCGAGGCGTGTGGCGAGGTGGTTCGACTACCGCGATCTTGCCCGGG  
CCTACGAGTCCGGCGACGGCCAAATGGTGGCGATCACCGACGACGAC  
ATCGCCAGCTTGCTGAAGAACGCAGCCGGGAGATCGAGGTGTTGGA  
GTTTCGTCCCCGCCGCCGACGTGGACCCGATGATGTTTCGACCGCAGCT  
ACTTTTTGGAGCCTGATTTCGAAGTCGTCGAAATCGTATGTGCTGCTGG  
CTAAGACACTCGCCGAAACCGACCGGATGGCGATCGTGCAATTCACGC  
TGCGCAACAAGACCAGGCTGGCGGCGTTGCGCGTCAAGGATTCGGC  
AAGCGAGAGGTGATGATGGTGCACACGTTGCTGTGGCCCGATGAGAT  
CCGCGACCCCGACTTCCCGGTGCTGGACCAGAAGGTGGAGATCAAAC

---

CCGCGGAACTCAAGATGGCCGGCCAGGTGGTGGACTCGATGGCCGAC  
GACTTCAATCCGGACCGCTACCACGACACCTACCAGGAGCAGTTACAG  
GAGCTGATCGACACCAAACCTCGAAGGTGGGCAGGCATTTACCGCCGA  
GGACCAACCGAGGTTGCTGGACGAGCCCGAAGACGTCTCCGACCTGC  
TCGCCAAGCTGGAGGCCAGCGTGAAGGCCGCGCTCGAAGGCCAACTCA  
AACGTCCCAACGCCTCCGTGA

**tracRNA-Cas9-CRISPR array**

AAAAAAGCACCGACTCGGTGCCACTTTTTCAAGTTGATAACGGACTA  
GCCTTATTTTAACTTGCTATGCTGTTTTGAATGGTTCCAACAAGATTAT  
TTTATAACTTTTATAACAAATAATCAAGGAGAAATTCAAAGAAATTTATC  
AGCCATAAAACAATACTTAATACTATAGAATGATAACAAAATAAACTACT  
TTTTAAAAGAATTTTGTGTTATAATCTATTTATTATTAAGTATTGGGTAAT  
ATTTTTGAAGAGATATTTTGAAAAAGAAAAATTAAAGCATATTAACCT  
AATTCGGAGGTCATTAAACTATTATTGAAATCATCAAACCTCATTATG  
GATTTAATTTAACTTTTTATTTAGGAGGCCAAAATGGATAAGAAATA  
CTCAATAGGCTTAGATATCGGCACAAATAGCGTCGGATGGGCGGTGAT  
CACTGATGAATATAAGGTTCCGTCTAAAAAGTTCAAGGTTCTGGGAAA  
TACAGACCGCCACAGTATCAAAAAAATCTTATAGGGGCTCTTTTATTT  
GACAGTGGAGAGACAGCGGAAGCGACTCGTCTCAAACGGACAGCTCG  
TAGAAGGTATACACGTCGGAAGAATCGTATTTGTTATCTACAGGAGATT  
TTTTCAAATGAGATGGCGAAAGTAGATGATAGTTTCTTTCATCGACTTG  
AAGAGTCTTTTTTGGTGGAAGAAGACAAGAAGCATGAACGTCATCCTA  
TTTTTGGAATATAGTAGATGAAGTTGCTTATCATGAGAAATATCCAAC  
TATCTATCATCTGCGAAAAAATTGGTAGATTCTACTGATAAAGCGGAT  
TTGCGCTTAATCTATTTGGCCTTAGCGCATATGATTAAGTTTCGTGGTC  
ATTTTTTGATTGAGGGAGATTTAAATCCTGATAATAGTGATGTGGACAA  
ACTATTTATCCAGTTGGTACAAACCTACAATCAATTATTTGAAGAAAAC  
CCTATTAACGCAAGTGGAGTAGATGCTAAAGCGATTCTTTCTGCACGA  
TTGAGTAAATCAAGACGATTAGAAAATCTCATTGCTCAGCTCCCCGGT  
GAGAAGAAAAATGGCTTATTTGGGAATCTCATTGCTTTGTCATTGGGT  
TTGACCCCTAATTTTAAATCAAATTTTGATTTGGCAGAAGATGCTAAAT  
TACAGCTTTCAAAGATACTTACGATGATGATTTAGATAATTTATTGGC  
GCAAATTGGAGATCAATATGCTGATTTGTTTTTGGCAGCTAAGAATTTA

---

TCAGATGCTATTTTACTTTTCAGATATCCTAAGAGTAAATACTGAAATAAC  
TAAGGCTCCCCTATCAGCTTCAATGATTAACGCTACGATGAACATCAT  
CAAGACTTGACTCTTTTAAAAGCTTTAGTTTCGACAACAACCTCCAGAA  
AAGTATAAAGAAATCTTTTTTGATCAATCAAAAAACGGATATGCAGGTT  
ATATTGATGGGGGAGCTAGCCAAGAAGAATTTTATAAATTTATCAAACC  
AATTTTAGAAAAATGGATGGTACTGAGGAATTATTGGTGAAACTAAAT  
CGTGAAGATTTGCTGCGCAAGCAACGGACCTTTGACAACGGCTCTATT  
CCCCATCAAATTCACTTGGGTGAGCTGCATGCTATTTTGAGAAGACAA  
GAAGACTTTTATCCATTTTAAAAGACAATCGTGAGAAGATTGAAAAA  
ATCTTGACTTTTCGAATTCCTTATTATGTTGGTCCATTGGCGCGTGGCA  
ATAGTCGTTTTGCATGGATGACTCGGAAGTCTGAAGAAACAATTACCC  
CATGGAATTTTGAAGAAGTTGTTCGATAAAGGTGCTTCAGCTCAATCAT  
TTATTGAACGCATGACAACTTTGATAAAAAATCTTCCAAATGAAAAAGT  
ACTACCAAACATAGTTTGCTTTATGAGTATTTTACGGTTTATAACGAAT  
TGACAAAGGTCAAATATGTTACTGAAGGAATGCGAAAACCAGCATTTC  
TTTCAGGTGAACAGAAGAAAGCCATTGTTGATTTACTCTTCAAAACAA  
ATCGAAAAGTAACCGTTAAGCAATTAAGAAGATTATTTCAAAAAAAT  
AGAATGTTTTGATAGTGTTGAAATTTACAGGAGTTGAAGATAGATTTAAT  
GCTTCATTAGGTACCTACCATGATTTGCTAAAAATTATTAAGATAAAG  
ATTTTTTGGATAATGAAGAAAATGAAGATATCTTAGAGGATATTGTTTTA  
ACATTGACCTTATTTGAAGATAGGGAGATGATTGAGGAAAGACTTAAA  
ACATATGCTCACCTCTTTGATGATAAGGTGATGAAACAGCTTAAACGTC  
GCCGTTATACTGGTTGGGGACGTTTGTCTCGAAAATTGATTAATGGTAT  
TAGGGATAAGCAATCTGGCAAAACAATATTAGATTTTTTGAATCAGAT  
GGTTTTGCCAATCGCAATTTTATGCAGCTGATCCATGATGATAGTTTGA  
CATTAAAGAAGACATTCAAAAAGCACAAGTGTCTGGACAAGGCGATA  
GTTTACATGAACATATTGCAAATTTAGCTGGTAGCCCTGCTATTA AAAA  
AGGTATTTTACAGACTGTAAAAGTTGTTGATGAATTGGTCAAAGTAATG  
GGGCGGCATAAGCCAGAAAATATCGTTATTGAAATGGCACGTGAAAAT  
CAGACAACCTCAAAGGGCCAGAAAATTCGCGAGAGCGTATGAAACG  
AATCGAAGAAGGTATCAAAGAATTAGGAAGTCAGATTCTTAAAGAGCA  
TCCTGTTGAAAATACTCAATTGCAAATGAAAAGCTCTATCTCTATTAT  
CTCCAAAATGGAAGAGACATGTATGTGGACCAAGAATTAGATATTAATC  
GTTTAAGTGATTATGATGTCGATCACATTGTTCCACAAAGTTTCCTTAA

---

AGACGATTCAATAGACAATAAGGTCTTAACGCGTTCTGATAAAAAATCGT  
GGTAAATCGGATAACGTTCCAAGTGAAGAAGTAGTCAAAAAGATGAAA  
AACTATTGGAGACAACCTTCTAAACGCCAAGTTAATCACTCAACGTAAG  
TTTGATAATTTAACGAAAGCTGAACGTGGAGGTTTGAGTGAACCTTGAT  
AAAGCTGGTTTTATCAAACGCCAATTGGTTGAAACTCGCCAAATCACT  
AAGCATGTGGCACAAATTTTGGATAGTCGCATGAATACTAAATACGATG  
AAAATGATAAACTTATTTCGAGAGGTTAAAGTGATTACCTTAAAATCTAA  
ATTAGTTTCTGACTTCCGAAAAGATTTCCAATTCTATAAAGTACGTGAG  
ATTAACAATTACCATCATGCCCATGATGCGTATCTAAATGCCGTCGTTG  
GAACTGCTTTGATTAAGAAATATCCAAAACCTTGAATCGGAGTTTGTCTA  
TGGTGATTATAAAGTTTATGATGTTTCGTAAAATGATTGCTAAGTCTGAG  
CAAGAAATAGGCAAAGCAACCGCAAATATTTCTTTTACTCTAATATCA  
TGAACCTTCTTCAAAACAGAAATTACACTTGCAAATGGAGAGATTTCGCA  
AACGCCCTCTAATCGAAACTAATGGGGAAACTGGAGAAATTGTCTGGG  
ATAAAGGGCGAGATTTTGCCACAGTGCACAAAGTATTGTCCATGCCCC  
AAGTCAATATTGTCAAGAAAACAGAAGTACAGACAGGCGGATTCTCCA  
AGGAGTCAATTTTACCAAAAAGAAATTCGGACAAGCTTATTGCTCGTA  
AAAAAGACTGGGATCCAAAAAATATGGTGGTTTTGATAGTCCAACGG  
TAGCTTATTCAGTCCTAGTGGTTGCTAAGGTGGAAAAAGGGAAATCGA  
AGAAGTTAAAATCCGTTAAAGAGTTACTAGGGATCACAATTATGGAAA  
GAAGTTCCTTTGAAAAAATCCGATTGACTTTTTTAGAAGCTAAAGGAT  
ATAAGGAAGTTAAAAAAGACTTAATCATTAAACTACCTAAATATAGTCTT  
TTTGAGTTAGAAAACGGTTCGTAAACGGATGCTGGCTAGTGCCGGAGA  
ATTACAAAAGGAAATGAGCTGGCTCTGCCAAGCAAATATGTGAATTT  
TTTATATTTAGCTAGTCATTATGAAAAGTTGAAGGGTAGTCCAGAAGAT  
AACGAACAAAAACAATTGTTTGTGGAGCAGCATAAGCATTATTTAGAT  
GAGATTATTGAGCAAATCAGTGAATTTTCTAAGCGTGTTATTTTAGCAG  
ATGCCAATTTAGATAAAGTTCTTAGTGATATAACAAACATAGAGACAA  
ACCAATACGTGAACAAGCAGAAAATATTATTCATTTATTTACGTTGACG  
AATCTTGGAGCTCCCGCTGCTTTTAAATATTTTGATACAACAATTGATC  
GTAAACGATATACGTCTACAAAAGAAGTTTTAGATGCCACTCTTATCCA  
TCAATCCATCACTGGTCTTTATGAAACACGCATTGATTTGAGTCAGCTA  
GGAGGTGACTGAAGTATATTTTAGATGAAGATTATTTCTTAATAACTAA  
AAATATGGTATAATACTCTTAATAAATGCAGTAATACAGGGGCTTTTCAA



---

GACTGAAGTCTAGCTGAGACAAATAGTGCGATTACGAAATTTTTTAGA  
CAAAAATAGTCTACGAGGTTTTAGAGCTATGCTGTTTTGAATGGTCCCA  
AAACTGAGACCAGTCTCGGAAGCTCAAAGGTCTCGTTTTAGAGCTATG  
CTGTTTTGAATGGTCCCAAAC

**P<sub>J23119</sub>-*Bsal*-sgRNA**

TTGACAGCTAGCTCAGTCCTAGGTATAATACTAGTTGAGACCAGTCTC  
GGAAGCTCAAAGGTCTCGTTTTAGAGCTAGAAATAGCAAGTTAAAAT  
AAGGCTAGTCCGTTATCAACTTGAAAAAGTGGCACCGAGTCGGTGC

- 1 Jiang, W. Y., Bikard, D., Cox, D., Zhang, F. & Marraffini, L. A. RNA-guided editing of bacterial genomes using CRISPR-Cas systems. *Nat Biotechnol* **31**, 233-239, doi:10.1038/nbt.2508 (2013).
- 2 Qi, L. S. *et al.* Repurposing CRISPR as an RNA-guided platform for sequence-specific control of gene expression. *Cell* **152**, 1173-1183, doi:10.1016/j.cell.2013.02.022 (2013).
- 3 Kuhlman, T. E. & Cox, E. C. Site-specific chromosomal integration of large synthetic constructs. *Nucleic Acids Res* **38**, doi:ARTN e9210.1093/nar/gkp1193 (2010).
- 4 Cherepanov, P. P. & Wackernagel, W. Gene disruption in *Escherichia coli*: TcR and KmR cassettes with the option of Flp-catalyzed excision of the antibiotic-resistance determinant. *Gene* **158**, 9-14 (1995).
